# Supplementary figures and images for: Efficiently Restored Thrombopoietin Production by Ashwell‐Morell Receptor and IL‐6R Induced Janus Kinase 2/Signal Transducer and Activator of Transcription Signaling Early After Partial Hepatectomy
Source: PubMed Central journal article supplement — Hepatology. 2021 Jun 4;74(1):411–27. doi: 10.1002/hep.31698 (PMC8236498; doi:10.1002/hep.31698), 2021-06-04

# Supporting Figure 1

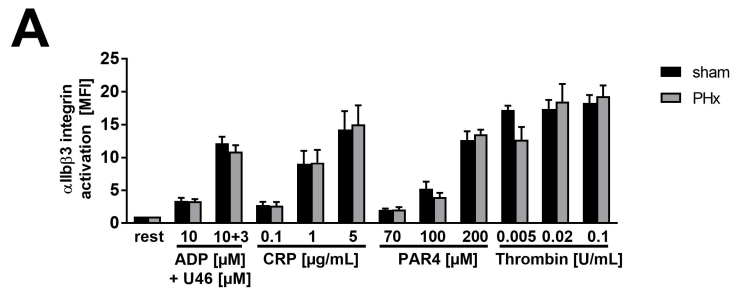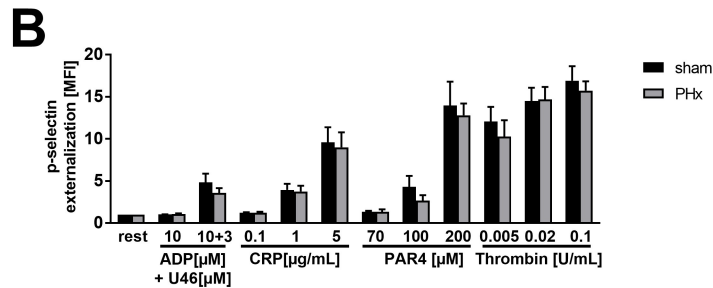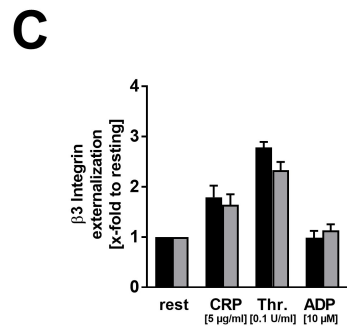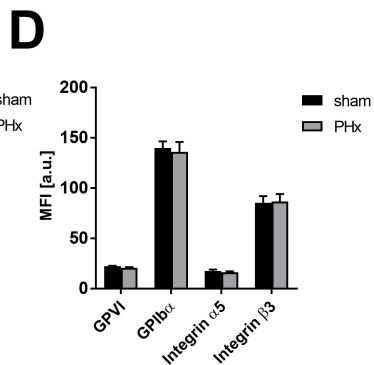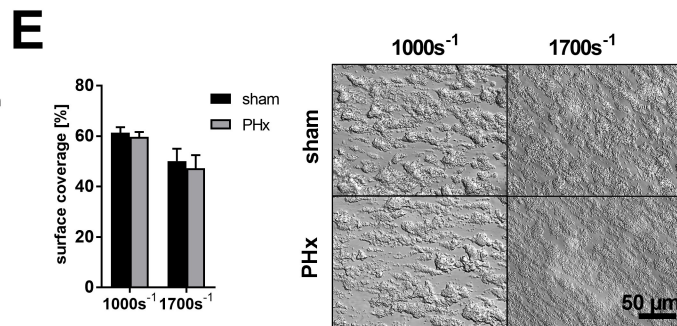

Supplement: NIHMS1691480-supplement-SF1.pdf [file NIHMS1691480-supplement-SF1.pdf]

# Supporting Figure 2

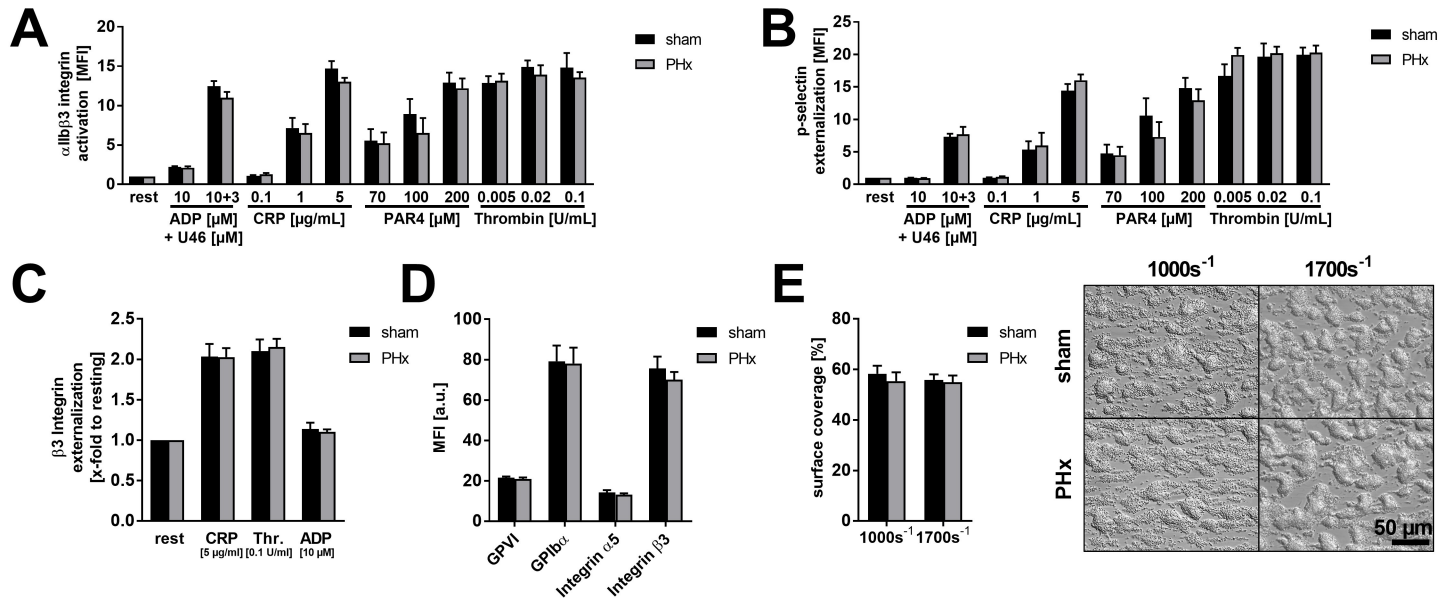

Supplement: NIHMS1691480-supplement-SF2.pdf [file NIHMS1691480-supplement-SF2.pdf]

# Supporting Figure 3

## A

### 1d PHx

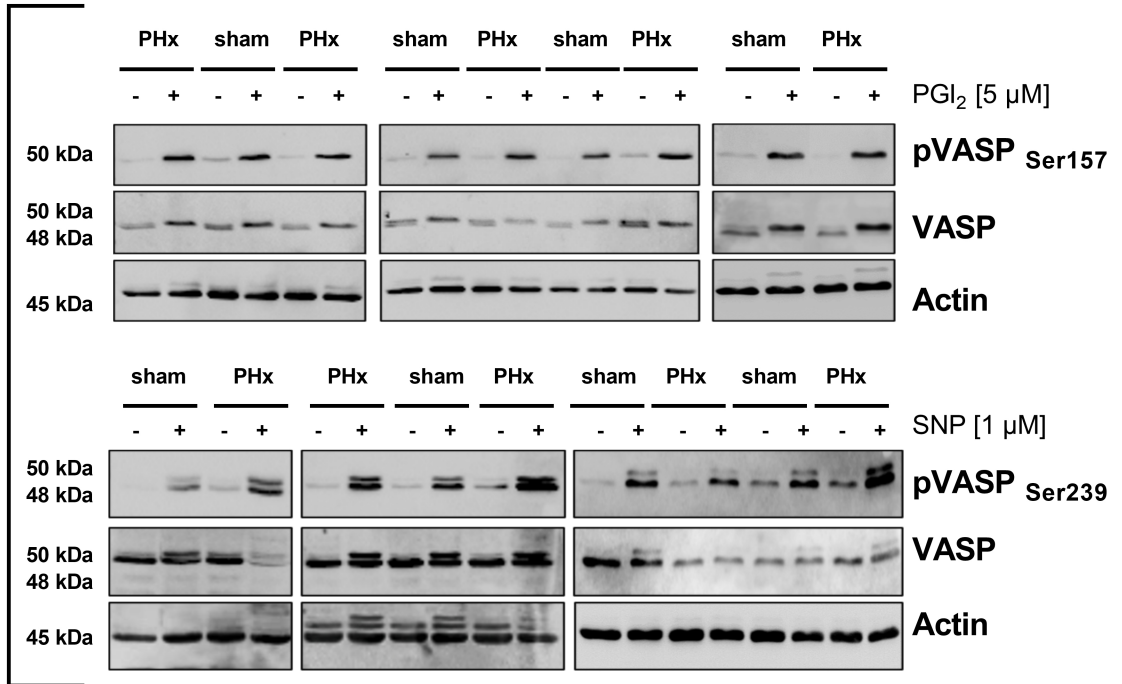

## B

### 3d PHx

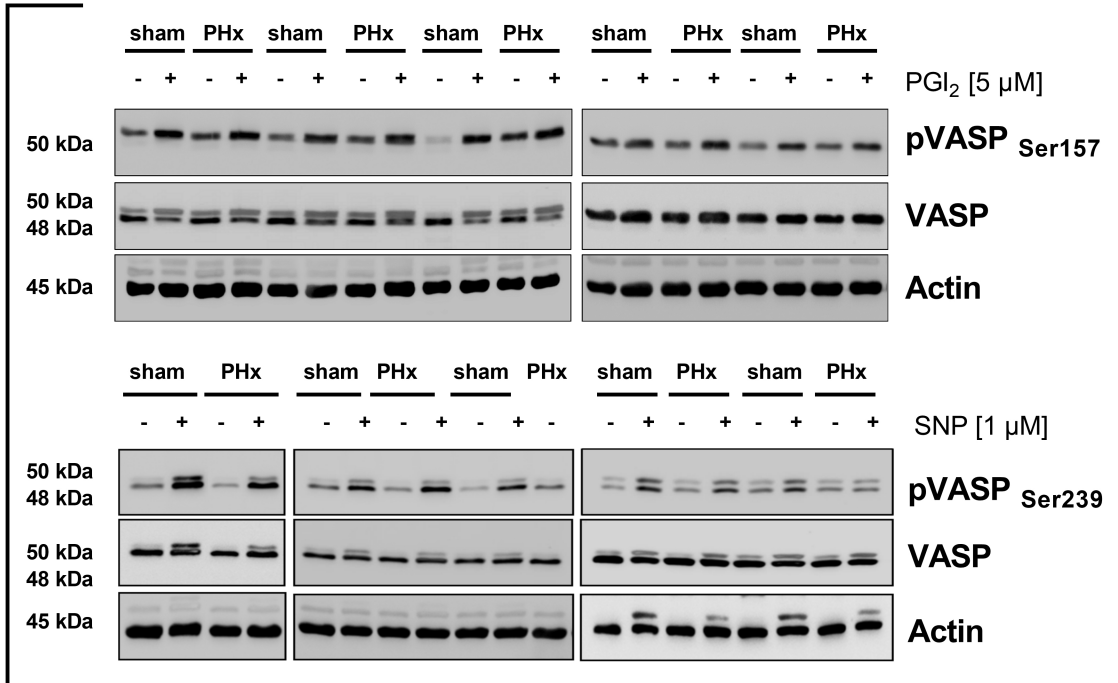

Supplement: NIHMS1691480-supplement-SF3.pdf [file NIHMS1691480-supplement-SF3.pdf]

# Supporting Figure 4

**A**

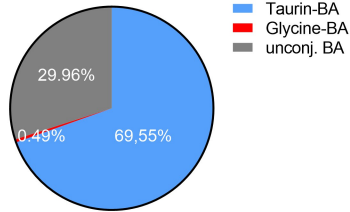

**B**

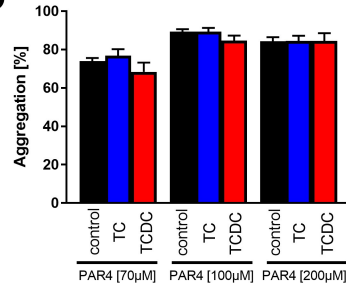

**C**

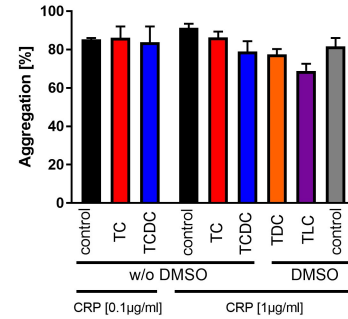

**D**

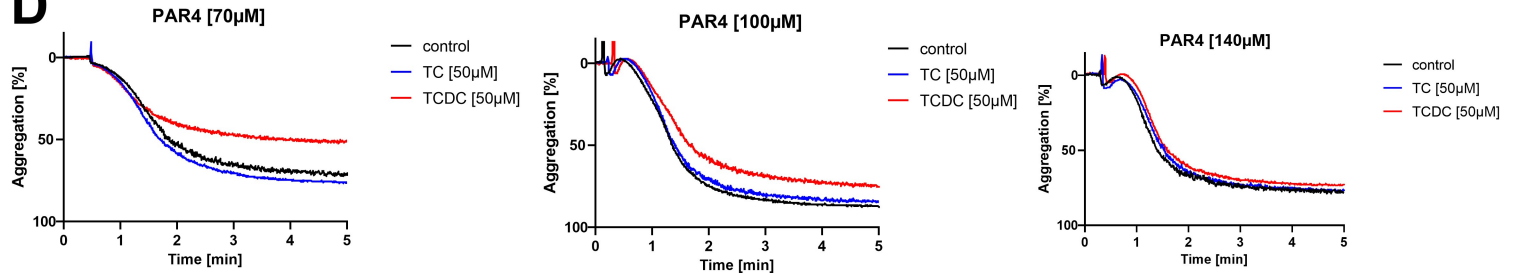

**E**

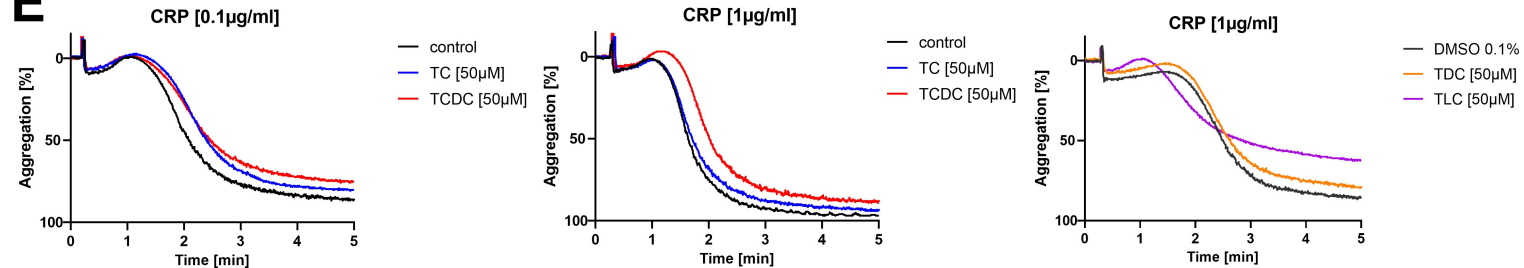

Supplement: NIHMS1691480-supplement-SF4.pdf [file NIHMS1691480-supplement-SF4.pdf]

# Supporting Figure 5

## A

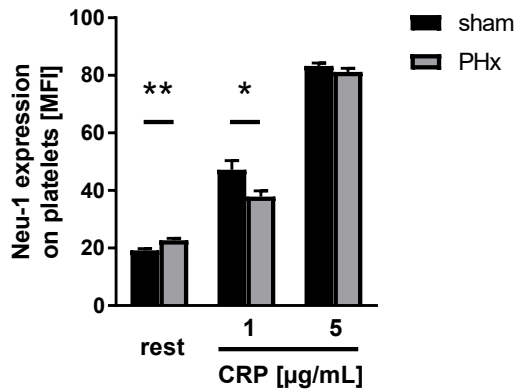

## B

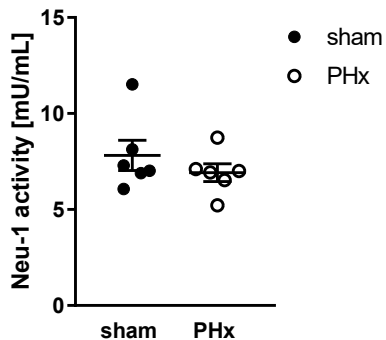

## C

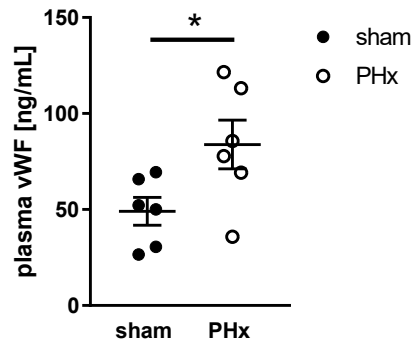

Supplement: NIHMS1691480-supplement-SF5.pdf [file NIHMS1691480-supplement-SF5.pdf]

# Supporting Figure 7

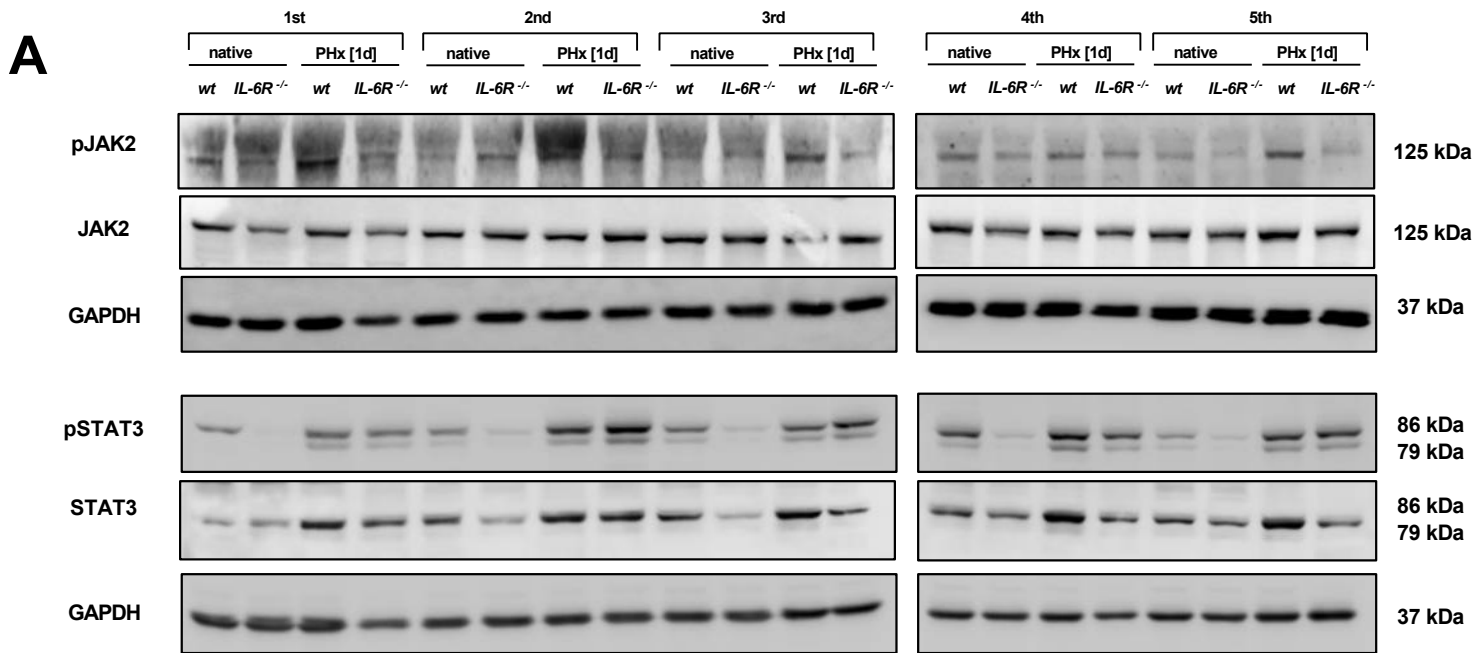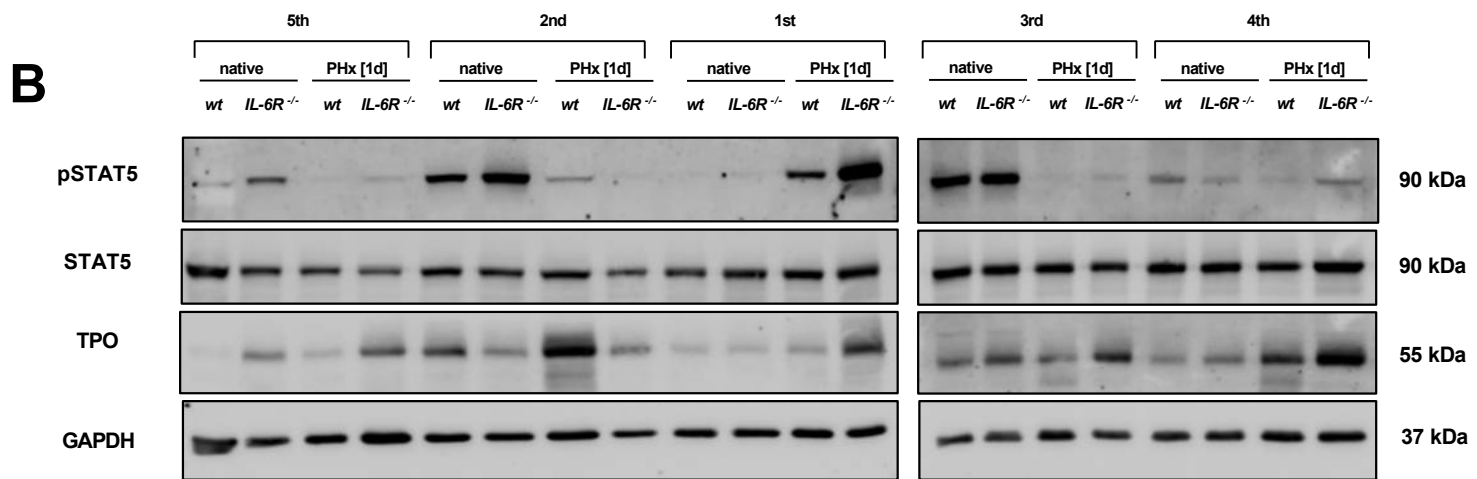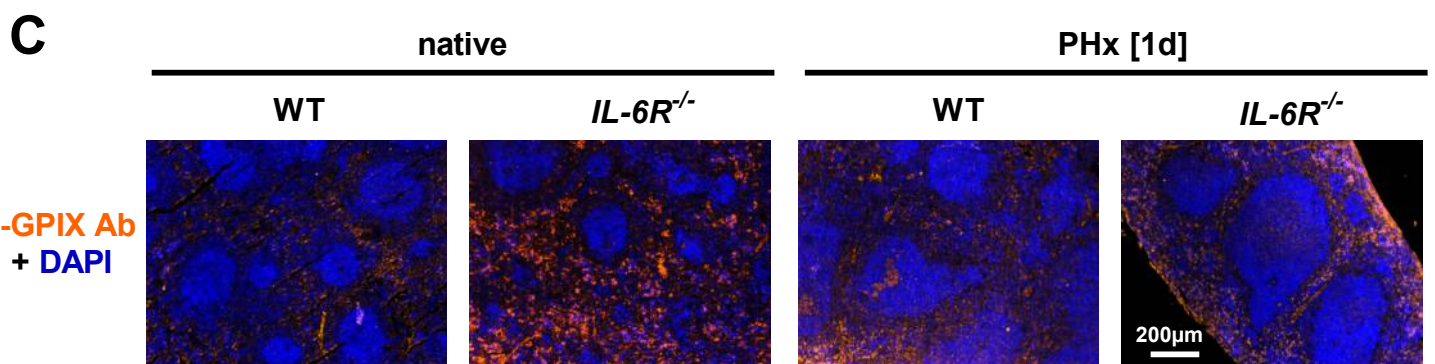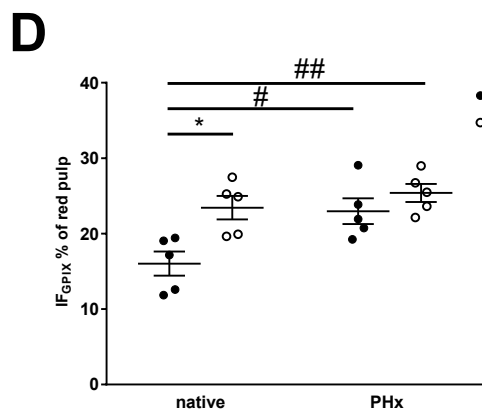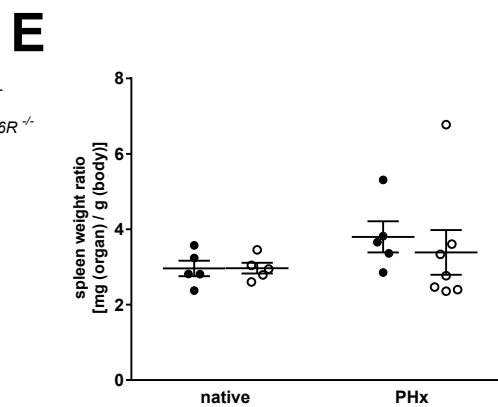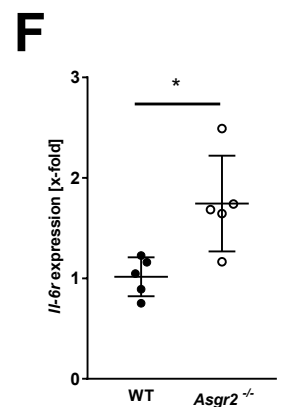

Supplement: NIHMS1691480-supplement-SF7.pdf [file NIHMS1691480-supplement-SF7.pdf]

# Supporting Figure 8

**A**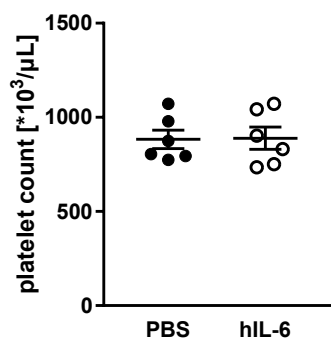**B**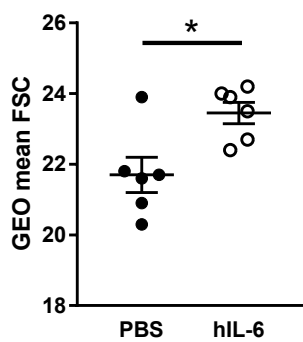**C**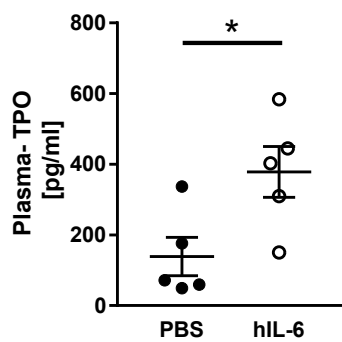**D**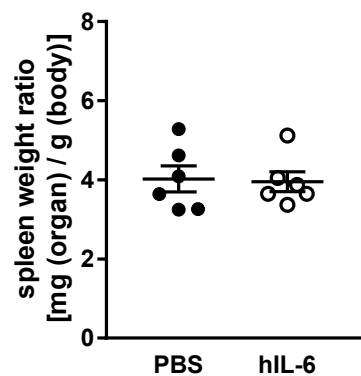**E**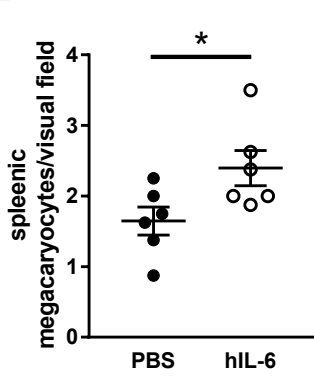**F**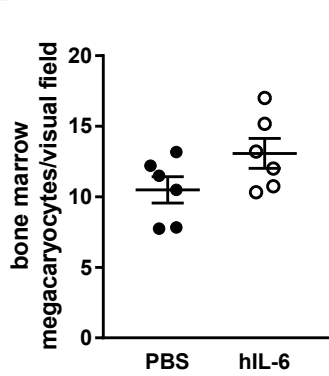**G**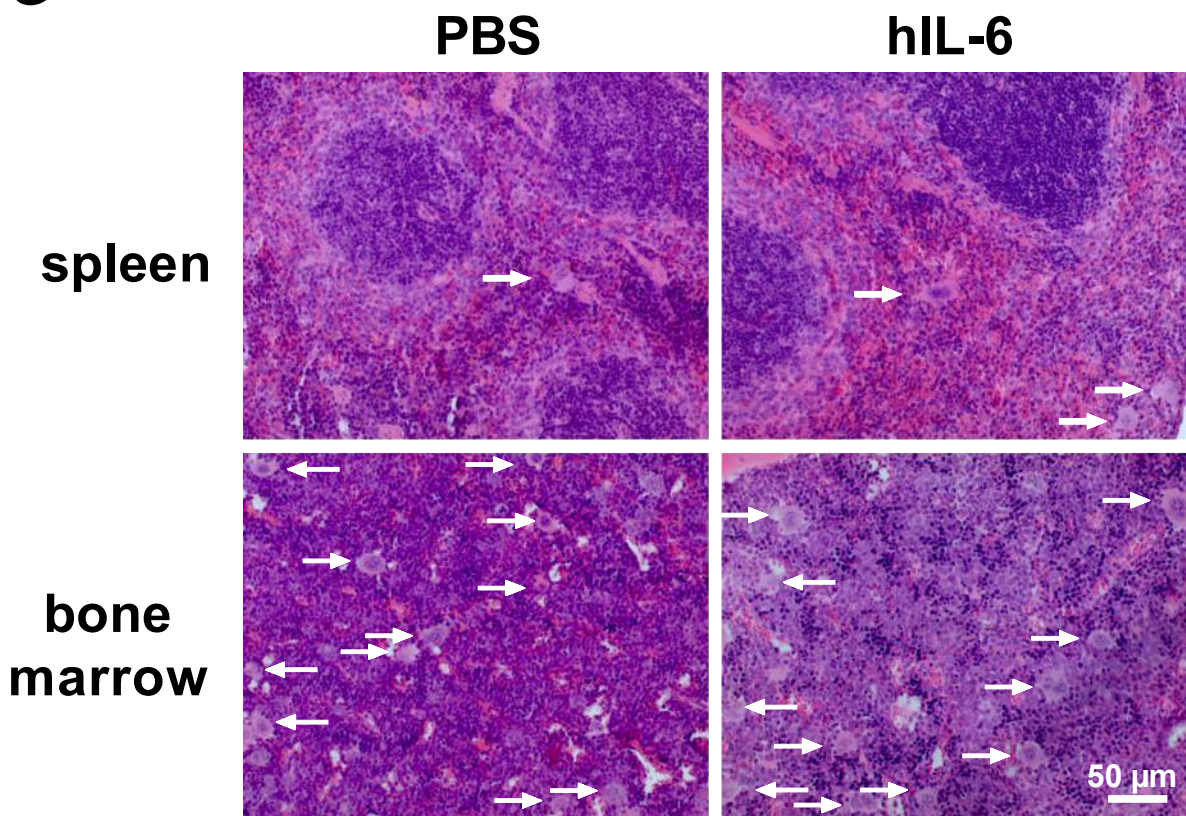

Supplement: NIHMS1691480-supplement-SF8.pdf [file NIHMS1691480-supplement-SF8.pdf]
